# Supplementary material for: Databases of virtual inorganic crystal structures and their applications
Source: Royal Society of Chemistry journal article supplement (doi:10.1039/c003907c), 2010-01-01
Supplement: c003907c.pdf [file c003907c.pdf]

## Databases of virtual inorganic crystal structures and their applications †

Armel Le Bail <sup>a</sup>

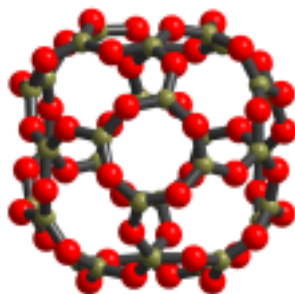

**Graphical abstract** : The PCOD (Predicted Crystallography Open Database) contains more than 1000000 entries including this nanosphere with  $B_{32}O_{48}$  formulation as proposed by the *GRINSP* software.

<sup>a</sup> *Université du Maine, Laboratoire des Oxydes et Fluorures, CNRS UMR 6010, Avenue O. Messiaen, 72085 Le Mans, France.*  
E-mail: [armel.le\\_bail@univ-lemans.fr](mailto:armel.le_bail@univ-lemans.fr)

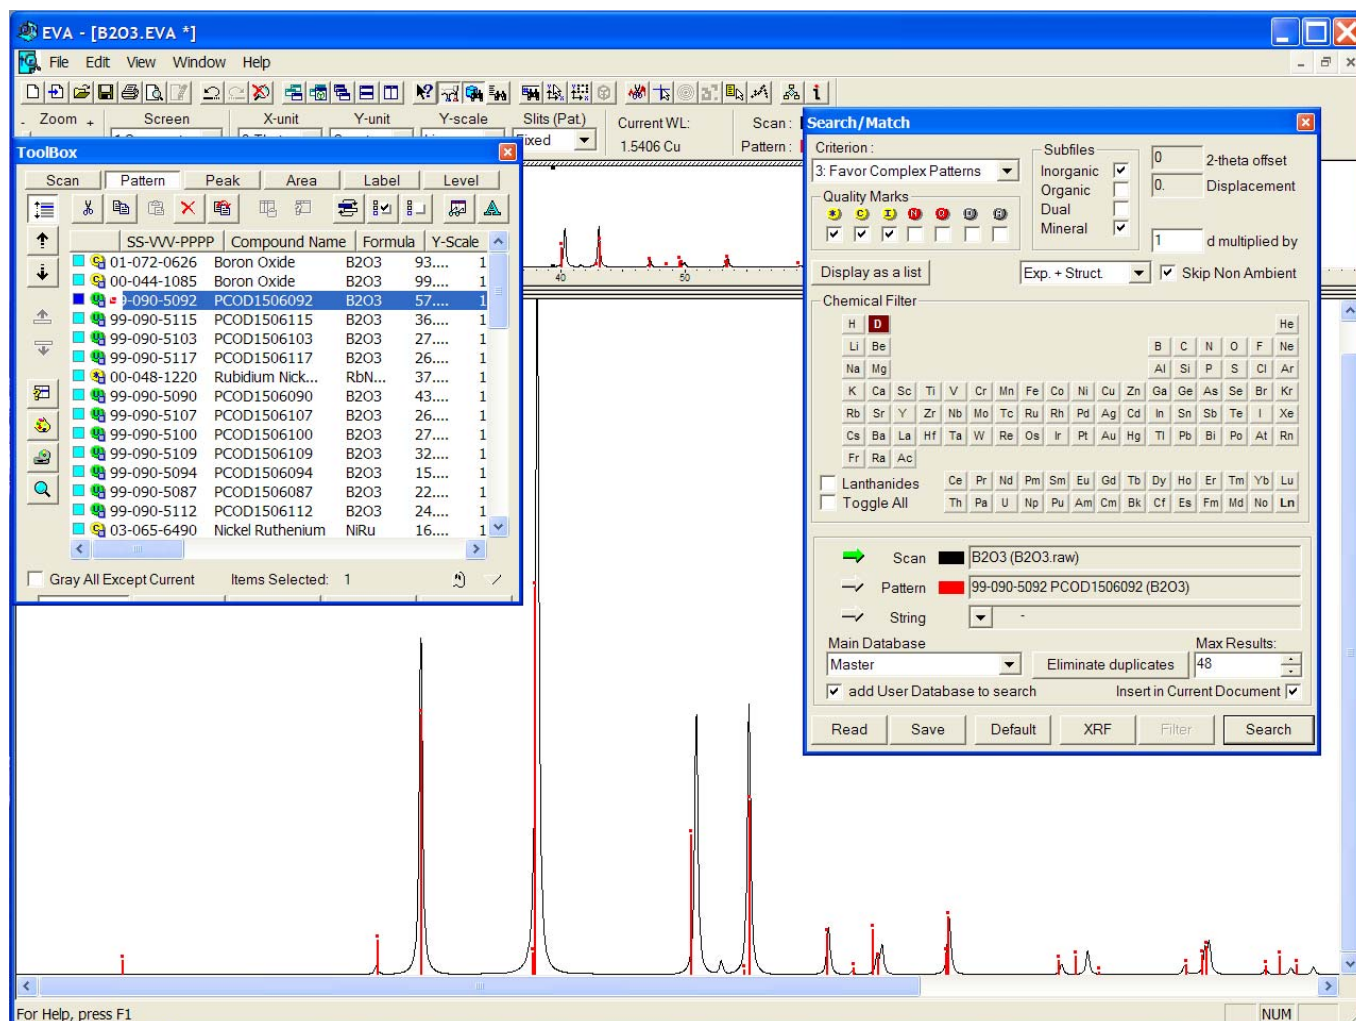

**Figure S1.** Positive search match by the *EVA*-Bruker program combined with the P2D2 database. Identification of B<sub>2</sub>O<sub>3</sub> form I as being predicted by *GRINSP*.

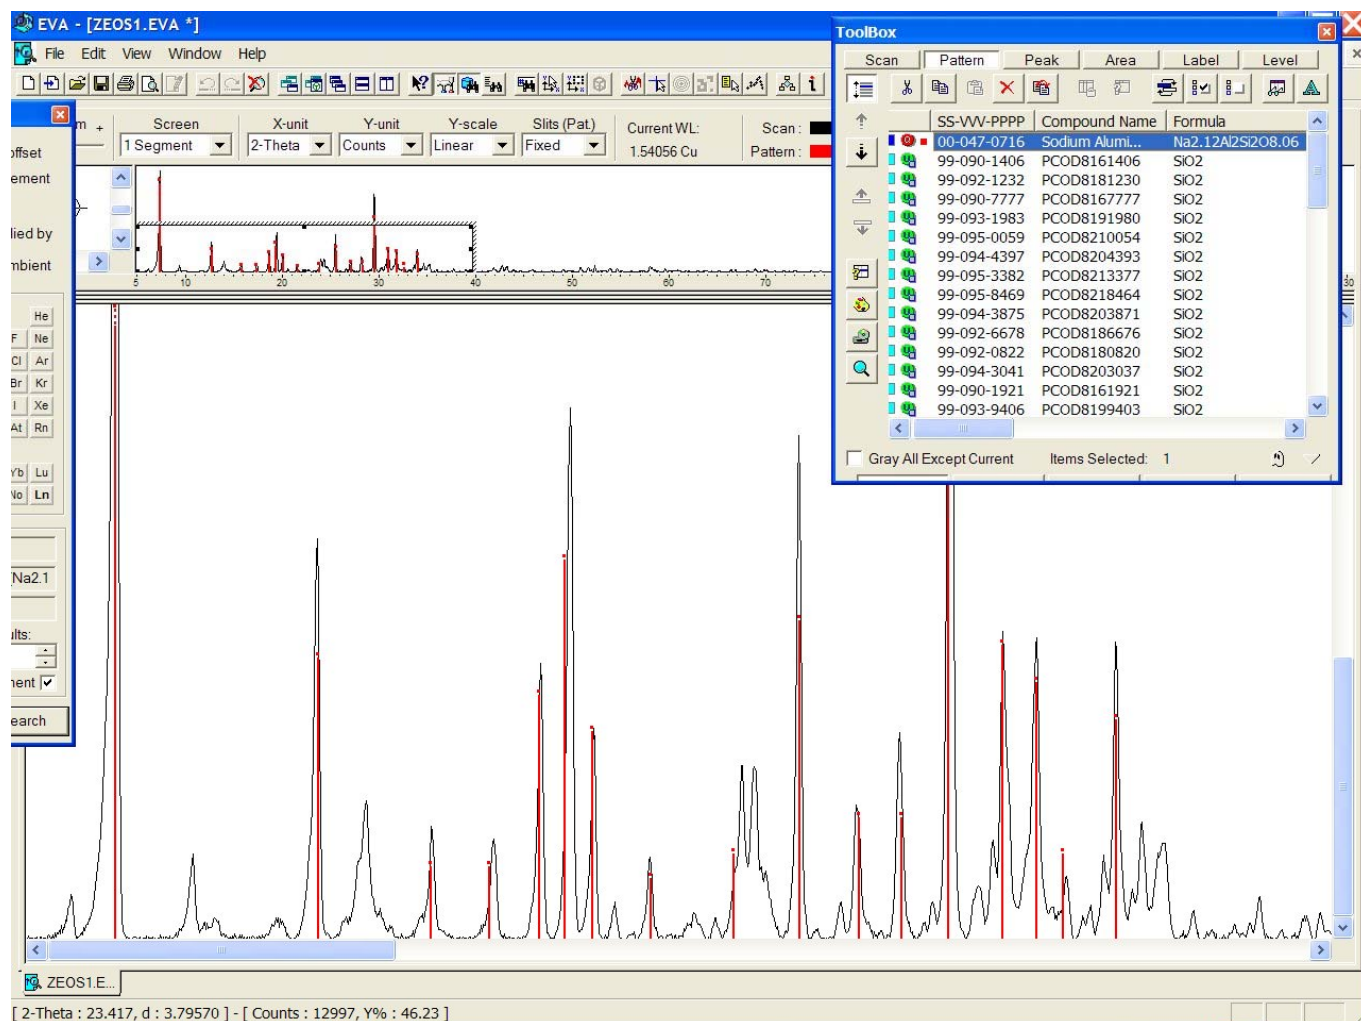

**Figure S2.** Positive search-matching for the "supposed to be" zeolite LZ-200 by using the *EVA*-Bruker software combined with the ICDD PDF (Powder Diffraction File). The matching PDF card 00-047-0716 (unindexed) does not explain all peaks suggesting that the sample contains impurities.

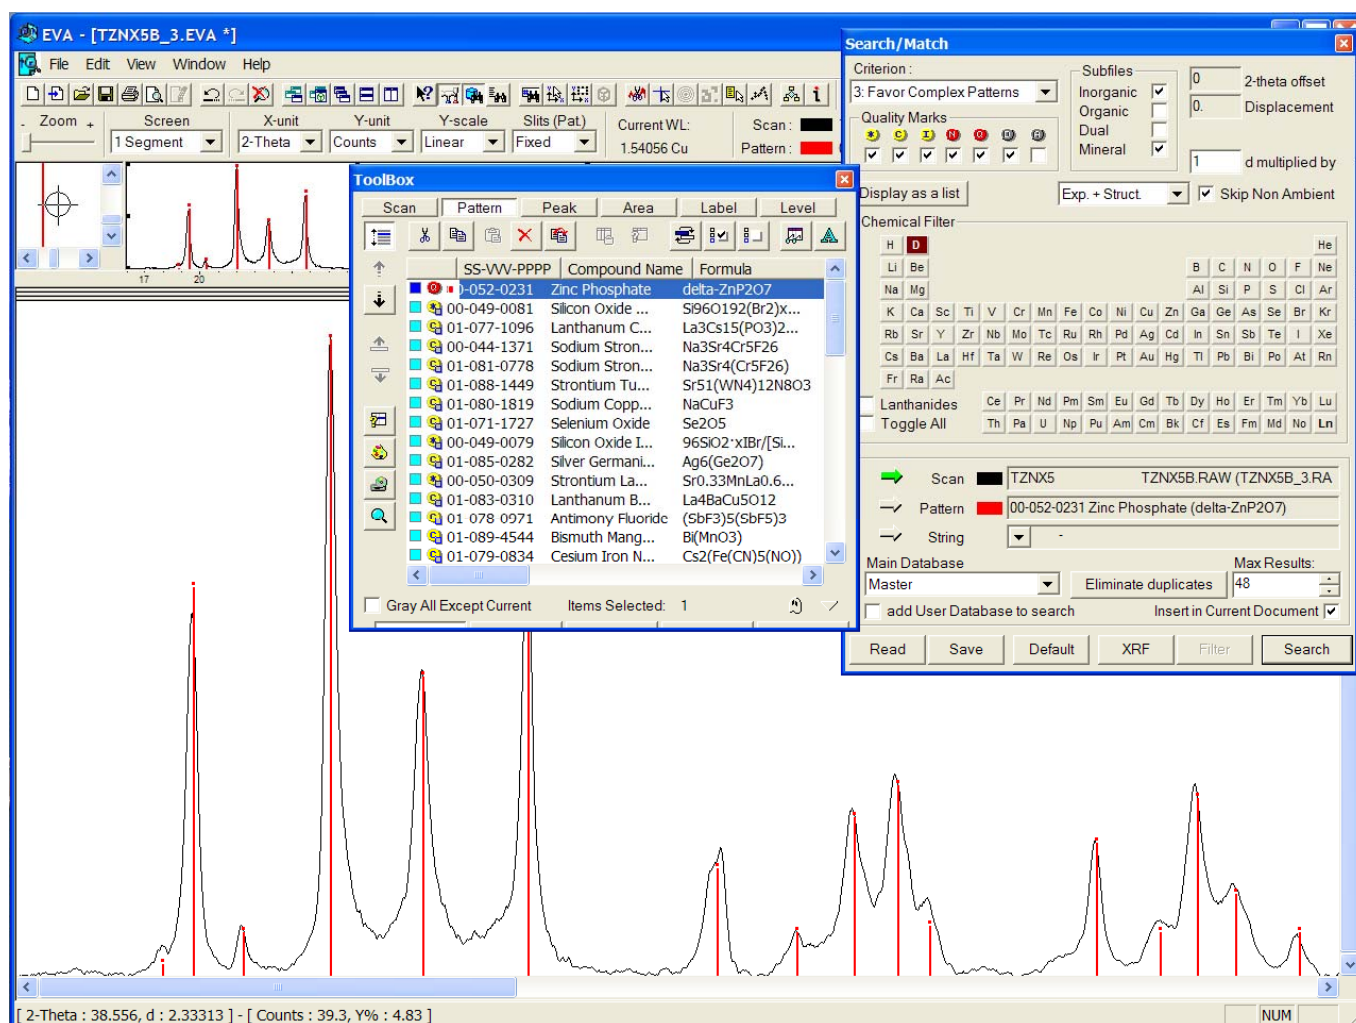

**Figure S3.** The poor quality and uncertainly indexed powder pattern of  $\delta\text{-Zn}_2\text{P}_2\text{O}_7$  of which the crystal structure can be proposed as a challenge to the ICSP community for its prediction.
